# Supplementary material for: Comparison of contribution to phase boundary from A-site aliovalent dopants in high-performance KNN-based ceramics
Source: Royal Society of Chemistry journal article supplement (doi:10.1039/d2cp04523k), 2022-01-01
Supplement: d2cp04523k1.pdf [file d2cp04523k1.pdf]

*Supplementary Information*

**Comparison of Contribution to Phase Boundary from A-site Aliovalent Dopant in  
High-performance KNN-based Ceramics**

Lin Zhao<sup>1</sup>, Wenjuan Wu<sup>2</sup>, Chunlin Zhao<sup>3</sup>, Bo Wu<sup>1</sup>, Jian Ma<sup>1</sup> and Hong Tao\*<sup>1</sup>

<sup>1</sup>Sichuan Prov Key Lab Informat Mat, Southwest Minzu University, Chengdu 610041,  
China.

<sup>2</sup>Sichuan Province Key Laboratory of Information Materials and Devices Application,  
Chengdu University of Information Technology, Chengdu, Sichuan, China

<sup>3</sup>Department of Materials Science, Fuzhou University, Fuzhou, 310002, China

\* **Corresponding author:** taohongscu@163.com

## 1. Structure analysis

Figure S1 shows the grain size distribution of the ceramics with  $x=0.010$ , 0.015 and 0.020. Figure S2 shows the Rietveld refinement of XRD patterns when  $2\theta=10-90^\circ$ . It can be seen that well-matched refined results are gained for the ceramics when  $x$  changes from 0.010 to 0.020. And the low sig and  $R_w$  values are presented in Table S1 along with structure parameters.

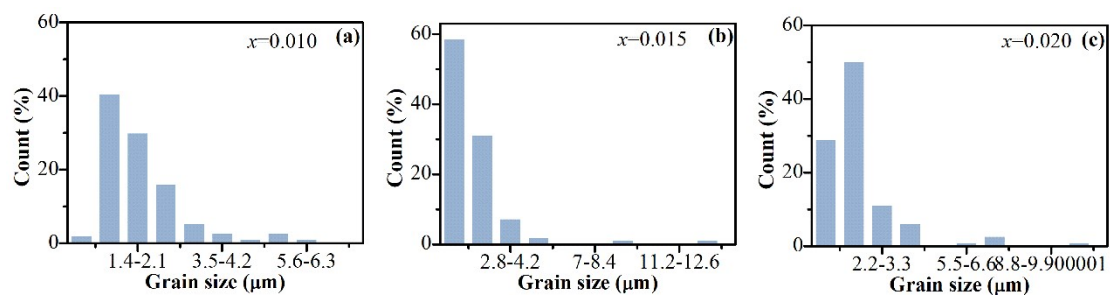

**Figure S1.** Grain size distribution of the ceramics: (a)  $x=0.010$ , (b)  $x=0.015$ , (c)  $x=0.020$ .

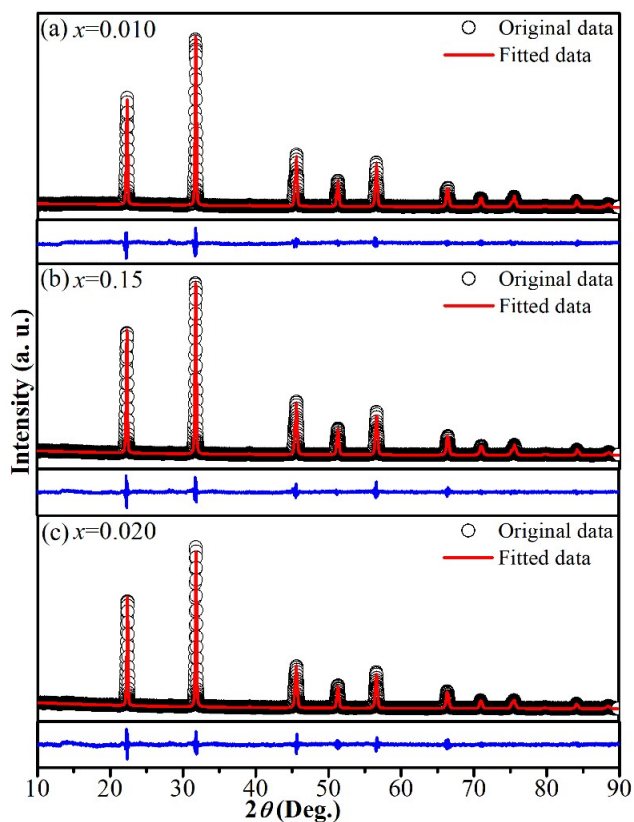

**Figure S2.** Rietveld refinement of XRD patterns for the ceramics when  $2\theta=10-90^\circ$ : (a)

$x=0.010$ , (b)  $x=0.015$ , (c)  $x=0.020$ .

Table S1. Structure parameters for the ceramics with different compositions, measured at 25 °C.

| $x$   | sig  | $R_w$ (%) | Space group | a (Å)  | b (Å)  | c (Å)  | Alpha(°) |
|-------|------|-----------|-------------|--------|--------|--------|----------|
| 0.010 | 1.94 | 2.42      | R3m         | 3.9873 | 3.9873 | 3.9873 | 89.9034  |
|       |      |           | Amm2        | 3.9732 | 5.6439 | 5.6601 | -        |
|       |      |           | P4mm        | 3.9750 | 3.9750 | 3.9979 | -        |
| 0.015 | 1.71 | 2.09      | R3m         | 3.9907 | 3.9907 | 3.9907 | 89.6313  |
|       |      |           | Amm2        | 3.9701 | 5.6450 | 5.6886 | -        |
|       |      |           | P4mm        | 3.9722 | 3.9722 | 3.9942 | -        |
| 0.020 | 1.60 | 2.06      | R3m         | 3.9860 | 3.9860 | 3.9860 | 89.7461  |
|       |      |           | Amm2        | 3.9715 | 5.6946 | 5.6318 | -        |
|       |      |           | P4mm        | 3.9714 | 3.9714 | 3.9914 | -        |

## 2. Electrical properties

Figure S3 shows the  $P$ - $E$  and  $I$ - $E$  loops of the ceramics with different compositions. The saturated loops maintained with little changed  $P_{\max}$  and  $P_r$  with increasing  $\text{Ca}^{2+}$  and reducing  $\text{Bi}^{3+}$ , while a slight decline happens for  $E_C$ . And the electric current peaks induced by domain switching shift to lower electric field, corresponding to the lowered  $E_C$ .

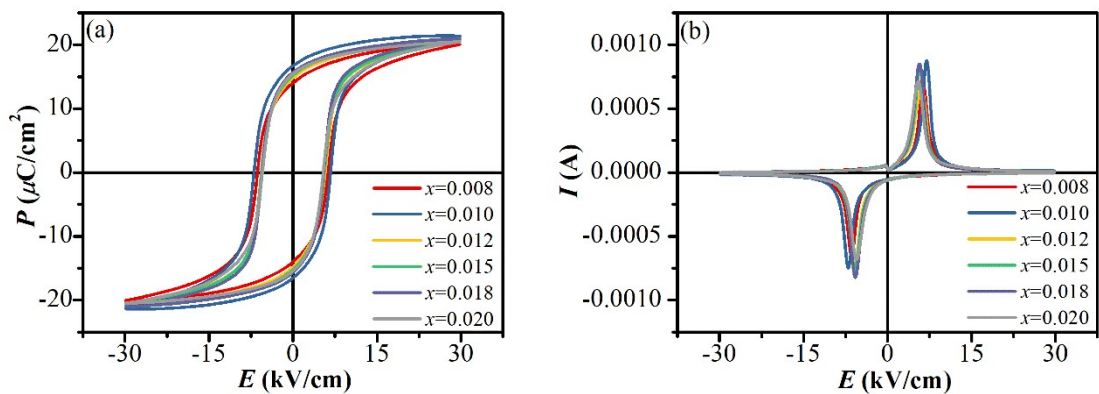

**Figure S3.** (a)  $P$ - $E$  loops and (b)  $I$ - $E$  curves of the ceramics

### 3. Temperature stability

Figure S4 shows  $P$ - $E$  loops for the ceramics measured at different temperatures. One can see the  $P$ - $E$  loops gradually become slim with increasing temperature, implying reduced  $P_{\max}$  and  $P_r$  values which originate from lowered polarization and difficult orientation of dipoles under thermal disturbance. And the  $E_C$  decreases because of the increased activity under thermal field.

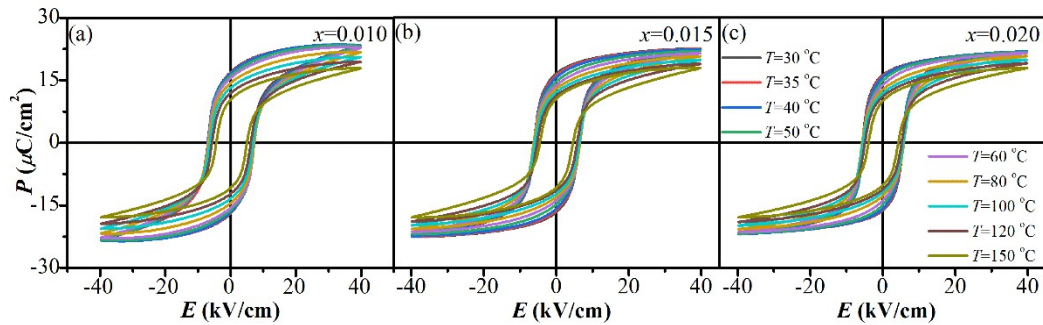

**Figure S4.** Temperature-dependent  $P$ - $E$  loops: (a)  $x=0.010$ , (b)  $x=0.015$ , (c)  $x=0.020$ .

Figure S5 shows the small signal  $d_{33}$  curves of the ceramics measured at different temperatures. The vertical coordinates at zero electric field is the small signal  $d_{33}$  values after poling. Obviously, the small signal  $d_{33}$  depends on temperature, which is due to the closely relationship between temperature and polycrystalline phase boundary in KNN-based ceramics.

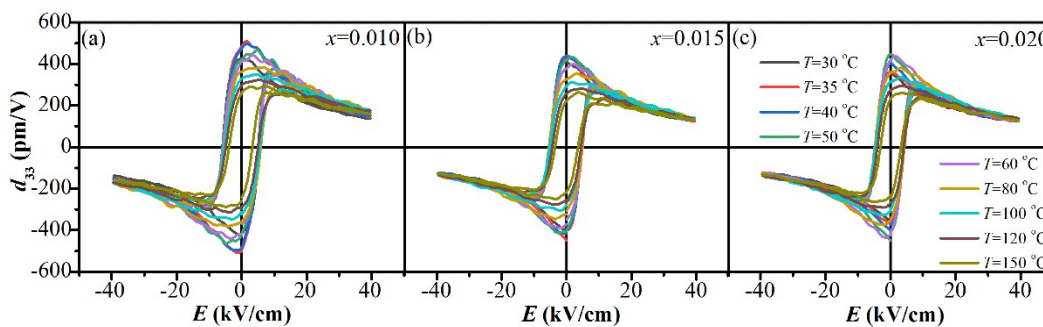

**Figure S5.** Temperature-dependent small signal  $d_{33}$  curves: (a)  $x=0.010$ , (b)  $x=0.015$ , (c)  $x=0.020$ .

Figure S6 shows the bipolar and unipolar strain curves of the ceramics measured at different temperatures. According to bipolar strain curves [Fig. S6(a)~(c)], both  $s_{\text{pos}}$  and  $s_{\text{neg}}$  is related to temperature. And  $s_{\text{uni}}$  show similar values and change tendency to  $s_{\text{pos}}$ , as seen in Fig. S6(d)~(f). The temperature dependence of strain is owing to the temperature-related converse piezoelectric effect, non-180° domain switching, domain wall motion, electrostriction, and possible electric field-induced phase transition [1, 2].

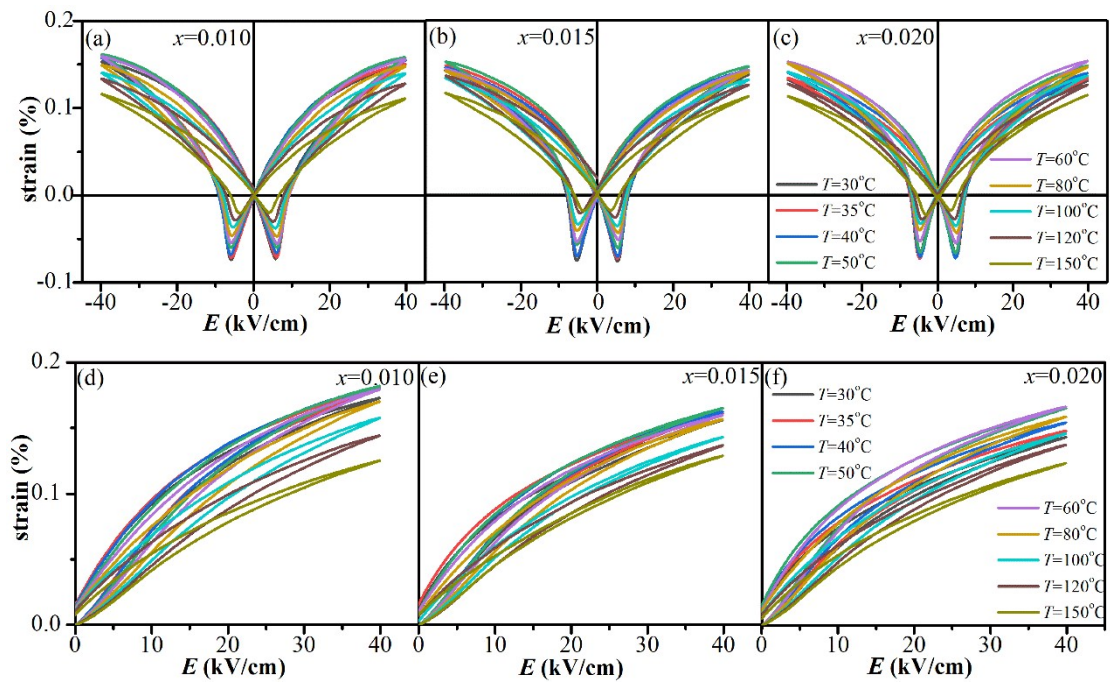

**Figure S6.** Temperature-dependent bipolar strain curves: (a)  $x=0.010$ , (b)  $x=0.015$ , (c)  $x=0.020$ ; temperature-dependent unipolar strain curves: (d)  $x=0.010$ , (e)  $x=0.015$ , (f)  $x=0.020$ .

## Reference

- [1] X. Lv, J. G. Zhu, D. Q. Xiao, X. X. Zhang, J. G. Wu, Emerging new phase boundary in potassium sodium-niobate based ceramics, *Chem. Soc. Rev.*, 2020, 49, 671-707.
- [2] C. L. Zhao, B. Wu, K. Wang, J. F. Li, D. Q. Xiao, J. G. Zhu, J. G. Wu, Practical high strain with superior temperature stability in lead-free piezoceramics through domain engineering. *J. Mater. Chem. A.*, 2018, 6, 23736–23745.
